# Supplementary material for: Are Non-Native Plants Perceived to Be More Risky? Factors Influencing Horticulturists' Risk Perceptions of Ornamental Plant Species
Source: PubMed Central journal article supplement (PMC4086969; doi:10.1371/journal.pone.0102121), 2014-07-08
Supplement: pone.0102121.s001.pdf [file pone.0102121.s001.pdf]

**Table S1. Hierarchical regression analysis with Willingness to Engage in Risk Mitigation Behavior as dependent variable.** In the first model including socio-demographic variables only, the model explained 16% of the variance,  $F(14, 526) = 7.03, p < 0.001$ . Four variables denoting the main source of income (*Horticulture and landscape architecture* ( $\beta = 0.10$ ), *Potted plants and cut flowers* ( $\beta = -0.10$ ), *Tree nursery* ( $\beta = -0.23$ ), and *Others (combination of several sources of income)* ( $\beta = -0.15$ )), as well as the variable *Over 30 employees* ( $\beta = -0.12$ ) referring to the number of full time employees per year showed a significant influence on horticulturists willingness to act. The additional inclusion of the psychological variables describing risk perceptions ( $\beta = 0.39$ ) and perceptions of benefit ( $\beta = -0.35$ ) caused  $R^2$  to increase significantly by 32%  $F(2, 524) = 29.62, p < 0.001$ , (adjusted  $R^2 = 0.46$ ). Only the contributions of the variables *Horticulture and landscape architecture* ( $\beta = 0.09$ ) and *Tree nursery* ( $\beta = -0.08$ ) remained significant, and particularly the proportion of variance accounted for *Tree nursery* decreased considerably.

| Independent Variable                                 | Model 1 (a) |       |          | Model 1 (b) |       |         |
|------------------------------------------------------|-------------|-------|----------|-------------|-------|---------|
|                                                      | B           | SE    | $\beta$  | B           | SE    | $\beta$ |
| <i>Socio-Demographic Variables</i>                   |             |       |          |             |       |         |
| <b>Gender</b>                                        | 0.215       | 0.174 | 0.051    | 0.075       | 0.138 | 0.018   |
| <b>Age</b>                                           |             |       |          |             |       |         |
| 21 - 40 years                                        | -0.08       | 0.095 | -0.035   | -0.008      | 0.075 | -0.004  |
| 41 - 60 years†                                       | -           | -     | -        | -           | -     | -       |
| over 60 years                                        | -0.066      | 0.134 | -0.021   | 0.026       | 0.106 | 0.008   |
| <b>Position in Business</b>                          | -0.146      | 0.136 | -0.046   | 0.036       | 0.108 | 0.011   |
| <b>Main Source of Income</b>                         |             |       |          |             |       |         |
| Horticulture, landscape architecture, and gardening† | -           | -     | -        | -           | -     | -       |
| Horticulture and landscape architecture              | 0.25        | 0.113 | 0.10*    | 0.237       | 0.089 | 0.09**  |
| Gardening                                            | 0.242       | 0.139 | 0.08     | 0.191       | 0.11  | 0.063   |
| Potted plants and cut flowers                        | -0.291      | 0.138 | -0.10*   | -0.119      | 0.11  | -0.039  |
| Tree nursery                                         | -0.932      | 0.183 | -0.23*** | -0.312      | 0.149 | -0.08*  |
| Others (combination of several sources of income)    | -0.572      | 0.166 | -0.15*** | -0.091      | 0.134 | -0.024  |
| <b>Business Sector</b>                               |             |       |          |             |       |         |
| Wholesale market                                     | -0.313      | 0.206 | -0.066   | -0.201      | 0.163 | -0.042  |
| Private consumer business†                           | -           | -     | -        | -           | -     | -       |
| Mixed clientele                                      | -0.089      | 0.1   | -0.039   | 0.036       | 0.08  | 0.016   |

**Number of Full Time Employees**

|                   |        |       |        |        |       |        |
|-------------------|--------|-------|--------|--------|-------|--------|
| 1 - 5 employees†  | -      | -     | -      | -      | -     | -      |
| 6 - 15 employees  | 0.049  | 0.101 | 0.022  | 0.016  | 0.08  | 0.007  |
| 16 - 30 employees | -0.191 | 0.136 | -0.063 | -0.068 | 0.108 | -0.022 |
| over 30 employees | -0.397 | 0.154 | -0.12* | -0.192 | 0.123 | -0.056 |

*Psychological Variables***Benefit**

-0.336 0.035 -0.35\*\*\*

**Risk Perception**

0.298 0.028 0.39\*\*\*

**R<sup>2</sup>**

0.16

0.46

**F**

7.03\*\*\*

29.62\*\*\*

**ΔF**

N.A.

158.353

Note: \* $p < 0.05$ , \*\* $p < 0.01$ , \*\*\* $p < 0.001$ ,  $N = 541$ .

Dummy variable gender was coded as 0 = male, 1 = female.

Position in Business was coded as 0 = other (e.g., head of department / administration), 1 = general manager or branch manager.

†Reference category.
