# Supplementary material for: Are Non-Native Plants Perceived to Be More Risky? Factors Influencing Horticulturists' Risk Perceptions of Ornamental Plant Species
Source: PubMed Central journal article supplement (PMC4086969; doi:10.1371/journal.pone.0102121), 2014-07-08
Supplement: pone.0102121.s002.pdf [file pone.0102121.s002.pdf]

**JardinSuisse has published the catalogue „Plants for our gardens“. This catalogue also lists the plants that are listed in questions 1 – 4 of this paragraph.**

1. In your opinion, how important are the following plants for landscape design in Switzerland?  
Please check what best applies to you.

|                                                                    | absolutely unimportant   |                          |                          |                          | very important           |                          |
|--------------------------------------------------------------------|--------------------------|--------------------------|--------------------------|--------------------------|--------------------------|--------------------------|
|                                                                    | 1                        | 2                        | 3                        | 4                        | 5                        | 6                        |
| Wisteria ( <i>Wisteria sp.</i> )                                   | <input type="checkbox"/> | <input type="checkbox"/> | <input type="checkbox"/> | <input type="checkbox"/> | <input type="checkbox"/> | <input type="checkbox"/> |
| Oregon grape ( <i>Mahonia aquifolium</i> )                         | <input type="checkbox"/> | <input type="checkbox"/> | <input type="checkbox"/> | <input type="checkbox"/> | <input type="checkbox"/> | <input type="checkbox"/> |
| Red-osier dogwood ( <i>Cornus sericea</i> )                        | <input type="checkbox"/> | <input type="checkbox"/> | <input type="checkbox"/> | <input type="checkbox"/> | <input type="checkbox"/> | <input type="checkbox"/> |
| Cherry laurel ( <i>Prunus laurocerasus</i> )                       | <input type="checkbox"/> | <input type="checkbox"/> | <input type="checkbox"/> | <input type="checkbox"/> | <input type="checkbox"/> | <input type="checkbox"/> |
| European spindle tree ( <i>Euonymus europaeus</i> )                | <input type="checkbox"/> | <input type="checkbox"/> | <input type="checkbox"/> | <input type="checkbox"/> | <input type="checkbox"/> | <input type="checkbox"/> |
| Henry's honeysuckle ( <i>Lonicera henryi</i> )                     | <input type="checkbox"/> | <input type="checkbox"/> | <input type="checkbox"/> | <input type="checkbox"/> | <input type="checkbox"/> | <input type="checkbox"/> |
| Blackthorn ( <i>Prunus spinosa</i> )                               | <input type="checkbox"/> | <input type="checkbox"/> | <input type="checkbox"/> | <input type="checkbox"/> | <input type="checkbox"/> | <input type="checkbox"/> |
| Russell lupin ( <i>Lupinus polyphyllus</i> )                       | <input type="checkbox"/> | <input type="checkbox"/> | <input type="checkbox"/> | <input type="checkbox"/> | <input type="checkbox"/> | <input type="checkbox"/> |
| Creeping sedum ( <i>Sedum spurium</i> )                            | <input type="checkbox"/> | <input type="checkbox"/> | <input type="checkbox"/> | <input type="checkbox"/> | <input type="checkbox"/> | <input type="checkbox"/> |
| Japanese honeysuckle ( <i>Lonicera japonica</i> )                  | <input type="checkbox"/> | <input type="checkbox"/> | <input type="checkbox"/> | <input type="checkbox"/> | <input type="checkbox"/> | <input type="checkbox"/> |
| Princess tree ( <i>Paulownia tomentosa</i> )                       | <input type="checkbox"/> | <input type="checkbox"/> | <input type="checkbox"/> | <input type="checkbox"/> | <input type="checkbox"/> | <input type="checkbox"/> |
| Lilac ( <i>Syringa sp.</i> )                                       | <input type="checkbox"/> | <input type="checkbox"/> | <input type="checkbox"/> | <input type="checkbox"/> | <input type="checkbox"/> | <input type="checkbox"/> |
| Black locust ( <i>Robinia pseudoacacia</i> )                       | <input type="checkbox"/> | <input type="checkbox"/> | <input type="checkbox"/> | <input type="checkbox"/> | <input type="checkbox"/> | <input type="checkbox"/> |
| Russian vine ( <i>Fallopia baldschuanica / Fallopia aubertii</i> ) | <input type="checkbox"/> | <input type="checkbox"/> | <input type="checkbox"/> | <input type="checkbox"/> | <input type="checkbox"/> | <input type="checkbox"/> |
| English holly ( <i>Ilex aquifolium</i> )                           | <input type="checkbox"/> | <input type="checkbox"/> | <input type="checkbox"/> | <input type="checkbox"/> | <input type="checkbox"/> | <input type="checkbox"/> |
| Butterfly bush ( <i>Buddleja davidii</i> )                         | <input type="checkbox"/> | <input type="checkbox"/> | <input type="checkbox"/> | <input type="checkbox"/> | <input type="checkbox"/> | <input type="checkbox"/> |
| Leatherleaf viburnum ( <i>Viburnum rhytidophyllum</i> )            | <input type="checkbox"/> | <input type="checkbox"/> | <input type="checkbox"/> | <input type="checkbox"/> | <input type="checkbox"/> | <input type="checkbox"/> |
| Chinese windmill palm ( <i>Trachycarpus fortunei</i> )             | <input type="checkbox"/> | <input type="checkbox"/> | <input type="checkbox"/> | <input type="checkbox"/> | <input type="checkbox"/> | <input type="checkbox"/> |

2. In your opinion, do the plants listed below belong to the native flora or are they non-native?

|                                                                    | native                   | non-native               |
|--------------------------------------------------------------------|--------------------------|--------------------------|
|                                                                    | 1                        | 2                        |
| Wisteria ( <i>Wisteria sp.</i> )                                   | <input type="checkbox"/> | <input type="checkbox"/> |
| Oregon grape ( <i>Mahonia aquifolium</i> )                         | <input type="checkbox"/> | <input type="checkbox"/> |
| Red-osier dogwood ( <i>Cornus sericea</i> )                        | <input type="checkbox"/> | <input type="checkbox"/> |
| Cherry laurel ( <i>Prunus laurocerasus</i> )                       | <input type="checkbox"/> | <input type="checkbox"/> |
| European spindle tree ( <i>Euonymus europaeus</i> )                | <input type="checkbox"/> | <input type="checkbox"/> |
| Henry's honeysuckle ( <i>Lonicera henryi</i> )                     | <input type="checkbox"/> | <input type="checkbox"/> |
| Blackthorn ( <i>Prunus spinosa</i> )                               | <input type="checkbox"/> | <input type="checkbox"/> |
| Russell lupin ( <i>Lupinus polyphyllus</i> )                       | <input type="checkbox"/> | <input type="checkbox"/> |
| Creeping sedum ( <i>Sedum spurium</i> )                            | <input type="checkbox"/> | <input type="checkbox"/> |
| Japanese honeysuckle ( <i>Lonicera japonica</i> )                  | <input type="checkbox"/> | <input type="checkbox"/> |
| Princess tree ( <i>Paulownia tomentosa</i> )                       | <input type="checkbox"/> | <input type="checkbox"/> |
| Lilac ( <i>Syringa sp.</i> )                                       | <input type="checkbox"/> | <input type="checkbox"/> |
| Black locust ( <i>Robinia pseudoacacia</i> )                       | <input type="checkbox"/> | <input type="checkbox"/> |
| Russian vine ( <i>Fallopia baldschuanica / Fallopia aubertii</i> ) | <input type="checkbox"/> | <input type="checkbox"/> |
| English holly ( <i>Ilex aquifolium</i> )                           | <input type="checkbox"/> | <input type="checkbox"/> |
| Butterfly bush ( <i>Buddleja davidii</i> )                         | <input type="checkbox"/> | <input type="checkbox"/> |
| Leatherleaf viburnum ( <i>Viburnum rhytidophyllum</i> )            | <input type="checkbox"/> | <input type="checkbox"/> |
| Chinese windmill palm ( <i>Trachycarpus fortunei</i> )             | <input type="checkbox"/> | <input type="checkbox"/> |









**We now propose a number of concrete measures in the handling of non-native plants. These measures go beyond the legal regulations.**

*We are interested to learn if you can imagine voluntarily participating in one or in several of the following measures. Please check what best applies to you.*

|                                                                                                                                                                                                                                                                                                | I cannot imagine at all  |                          |                          |                          | I can imagine very well  |                          |
|------------------------------------------------------------------------------------------------------------------------------------------------------------------------------------------------------------------------------------------------------------------------------------------------|--------------------------|--------------------------|--------------------------|--------------------------|--------------------------|--------------------------|
|                                                                                                                                                                                                                                                                                                | 1                        | 2                        | 3                        | 4                        | 5                        | 6                        |
| a Increase prices for plants that are included in the Black list (i.e. plants that had been listed by the Swiss Commission of Wild Plant Conservation to be invasive non-native plants in Switzerland, and that cause negative impacts in the context of biodiversity, health, and/or economy) | <input type="checkbox"/> | <input type="checkbox"/> | <input type="checkbox"/> | <input type="checkbox"/> | <input type="checkbox"/> | <input type="checkbox"/> |
| b Remove plants from my stock that are listed on the Black-list.                                                                                                                                                                                                                               | <input type="checkbox"/> | <input type="checkbox"/> | <input type="checkbox"/> | <input type="checkbox"/> | <input type="checkbox"/> | <input type="checkbox"/> |
| c Ban the sale of any non-native plant, until it has been shown that it does not pose a danger to humans or the environment.                                                                                                                                                                   | <input type="checkbox"/> | <input type="checkbox"/> | <input type="checkbox"/> | <input type="checkbox"/> | <input type="checkbox"/> | <input type="checkbox"/> |
| d Inform customers about invasive non-native plant species.                                                                                                                                                                                                                                    | <input type="checkbox"/> | <input type="checkbox"/> | <input type="checkbox"/> | <input type="checkbox"/> | <input type="checkbox"/> | <input type="checkbox"/> |
| e Promote the sale of native plants.                                                                                                                                                                                                                                                           | <input type="checkbox"/> | <input type="checkbox"/> | <input type="checkbox"/> | <input type="checkbox"/> | <input type="checkbox"/> | <input type="checkbox"/> |

**Different actors assess the risk whether a non-native plant will cause damage in Switzerland, or whether it has the potential to cause damage.**

1. *Until to date, to what extent has the green industry been included in creating lists with invasive plants, with plants that have the potential to become invasive, or with plants that are (no longer) allowed to be traded?*

| too little               | accurately               | excessively              |
|--------------------------|--------------------------|--------------------------|
| 1                        | 2                        | 3                        |
| <input type="checkbox"/> | <input type="checkbox"/> | <input type="checkbox"/> |

2. *In your opinion, what influence should the green industry have in future risk assessments of non-native plants compared to the prevalent practice?*

| less                     | the same                 | more                     |
|--------------------------|--------------------------|--------------------------|
| 1                        | 2                        | 3                        |
| <input type="checkbox"/> | <input type="checkbox"/> | <input type="checkbox"/> |

**Finally, we ask you to provide some information about your business as well as about yourself.**

1. In what business sector are you mainly working? 2. In what sector of the green industry are you mainly working? Please differentiate between the main source of income and the additional income.

|   |                                                    | main source of income                                            | additional income        |
|---|----------------------------------------------------|------------------------------------------------------------------|--------------------------|
| a | wholesale market <input type="checkbox"/>          | a horticulture / landscape architecture <input type="checkbox"/> | <input type="checkbox"/> |
| b | private consumer business <input type="checkbox"/> | b landscaping / gardening <input type="checkbox"/>               | <input type="checkbox"/> |
|   |                                                    | c supply services <input type="checkbox"/>                       | <input type="checkbox"/> |
| c | mixed clientele <input type="checkbox"/>           | d potted plants and cut flowers <input type="checkbox"/>         | <input type="checkbox"/> |
|   |                                                    | e tree nursery <input type="checkbox"/>                          | <input type="checkbox"/> |

3. What is the number of employees that on average have been working in your company for the past three years? (Counted up to full-time jobs during peak season)? 4. What is your function in your company?

|   |                                                      |   |                                                               |
|---|------------------------------------------------------|---|---------------------------------------------------------------|
| a | 1 - 5 full-time jobs <input type="checkbox"/>        | a | general management <input type="checkbox"/>                   |
| b | 6 - 15 full-time jobs <input type="checkbox"/>       | b | branch management <input type="checkbox"/>                    |
| c | 16 - 30 full-time jobs <input type="checkbox"/>      | c | head of department <input type="checkbox"/>                   |
| d | more than 30 full-time jobs <input type="checkbox"/> | d | case handling <input type="checkbox"/>                        |
|   |                                                      | e | training in the horticultural sector <input type="checkbox"/> |
|   |                                                      | f | internship <input type="checkbox"/>                           |
|   |                                                      | g | administration <input type="checkbox"/>                       |
|   |                                                      | h | other..... <input type="checkbox"/>                           |

5. What is your gender? 6. What is your year of birth?

- a male
- b female

|   |   |  |  |
|---|---|--|--|
| 1 | 9 |  |  |
|---|---|--|--|

7. What is currently your highest level of education?

- a primary school
- b lower secondary school
- c upper secondary vocational school
- d upper secondary university preparation school
- e college / university
- f others.....
